# Supplementary material for: Long-Term Changes in Sleep Disordered Breathing in Renal Transplant Patients: Relevance of the BMI
Source: MDPI journal article supplement (doi:10.3390/jcm9061739), 2020-06-04
Supplement: s1 [file s1]

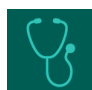

## Supplementary Material

# Long-Term Changes in Sleep Disordered Breathing in Renal Transplant Patients: Relevance of the BMI

Francesca Mallamaci <sup>1,2</sup>, Rocco Tripepi <sup>1</sup>, Graziella D'Arrigo <sup>1</sup>, Gaetana Porto <sup>1</sup>, Maria Carmela Versace <sup>1</sup>, Carmela Marino <sup>1</sup>, Maria Cristina Sanguedolce <sup>1</sup>, Giovanni Tripepi <sup>1</sup> and Carmine Zoccali <sup>1,\*</sup>

<sup>1</sup> CNR-IFC (National Research Council of Italy, Center of Clinical Physiology, Clinical Epidemiology of Renal Diseases and Hypertension Unit, Reggio Cal., c/o Ospedali Riuniti, Reggio Cal; francesca.mallamaci@libero.it (F.M.); rtripepi@ifc.cnr.it (R.T.); g.darrigostat@tin.it (G.D'A.); tania.porto25@hotmail.it (G.P.); permatica@gmail.com (M.C.V.); cmarino@ifc.cnr.it (C.M.); mcristinas@libero.it (M.C.S.); gtripepi@ifc.cnr.it (G.T.);

<sup>2</sup> Division of Nephrology and Transplantation, Department of Medicine, Ospedali Riuniti, Reggio Calabria Italy

Correspondence: carmine.zoccali@tin.it; Tel: +39-340-73540-62

**Supplemental Table S1** Concomitant therapies in the whole study population and in patients divided according to the AHI. Data are expressed as percent frequency. The total number of anti-hypertensive drugs is summarised as mean and standard deviation. All P values but the Total number of antihypertensive drugs were calculated by the Chi Square test. The P value of the number of antihypertensive drugs was calculated by ANOVA.

| Baseline characteristics                    | Whole group<br>(n=221) | Baseline apnea-hypopnea index (episodes/h) |                          |               | P            |
|---------------------------------------------|------------------------|--------------------------------------------|--------------------------|---------------|--------------|
|                                             |                        | <5.0<br>(n=166)                            | from 5 to < 15<br>(n=37) | >15<br>(n=18) |              |
| Erythropoietin                              | 10%                    | 12%                                        | 3%                       | 0.0%          | <b>0.046</b> |
| Statins                                     | 42%                    | 36%                                        | 57%                      | 67%           | <b>0.001</b> |
| Calcium antagonists                         | 49%                    | 46%                                        | 46%                      | 78%           | <b>0.04</b>  |
| Beta-blockers                               | 51%                    | 51%                                        | 54%                      | 44%           | 0.83         |
| ACE inhibitors                              | 52%                    | 51%                                        | 46%                      | 67%           | 0.47         |
| Sympatholytic agents /vasodilators          | 15%                    | 13%                                        | 16%                      | 33%           | <b>0.042</b> |
| Diuretics                                   | 18%                    | 16%                                        | 27%                      | 17%           | 0.43         |
| Total number of anti-hypertensive drugs (n) | 1.85±1.16              | 1.78±1.17                                  | 1.89±1.07                | 2.39±1.09     | <b>0.046</b> |
| On anti-hypertensive treatment (%)          | 88%                    | 87%                                        | 92%                      | 94%           | 0.23         |
| Cyclosporine (%)                            | 42%                    | 40%                                        | 43%                      | 50%           | 0.43         |
| Steroids (%)                                | 88%                    | 90%                                        | 81%                      | 78%           | <b>0.04</b>  |
| Azathioprine (%)                            | 37%                    | 35%                                        | 43%                      | 44%           | 0.27         |
| Tacrolimus (%)                              | 52%                    | 52%                                        | 49%                      | 50%           | 0.72         |
| Sirolimus (%)                               | 4%                     | 4%                                         | 5%                       | 0.0%          | 0.71         |
| Mycophenolate(%)                            | 48%                    | 51%                                        | 40%                      | 39%           | 0.19         |

**Supplementary Table 2** Adjusted multiple Generalized Estimating Equations (GEE) of AHI and minimal nocturnal O<sub>2</sub> saturation over time. The model includes all univariate correlates of AHI at baseline with  $P \leq 0.10$  (age, gender, diabetes as well as the BMI and eGFR and the change of sleep recorder Pamela→Somté. BMI and eGFR are tested as repeated measures). Data are regression coefficient (b), standard error (SE) and P value. \* BMI and eGFR are introduced into the model as repeated measurements.

| <i>Variables (units of increase)</i>  | <b>Apnea Hypopnea Index</b>               | <b>Minimal O<sub>2</sub> saturation</b>   |
|---------------------------------------|-------------------------------------------|-------------------------------------------|
|                                       | <i>Regression Coefficients and 95% CI</i> | <i>Regression Coefficients and 95% CI</i> |
| Age (5 years)                         | <b>1,102 (1,022-,189),P=0.012</b>         | <b>0,996 (0,992-,999),P=0.02</b>          |
| Male/females                          | <b>1,841 (1,135-,984),P=0.013</b>         | <b>0,979 (0,962-,997),P=0.02</b>          |
| Diabetes (yes/no)                     | 1,270 (0,503-3,203),P=0.61                | 0,963 (0,904-1,026),P=0.25                |
| *BMI (1 kg/m <sup>2</sup> )           | <b>1,109 (1,047-,174),P&lt;0.001</b>      | <b>0,993 (0,990-,996),P&lt;0.001</b>      |
| *eGFR (1 ml/min/1.73 m <sup>2</sup> ) | 0,999 (0,989-1,009),P=0.86                | 1,000 (1,000-1,000),P=0.97                |
| Visit (0,1,2)                         | 1,233 (1,013-,500),P=0.037                | 0,986 (0,972-,999),P=0.047                |
| Change of the sleep recorder (yes/no) | <b>2,270 (1,511-,410),P&lt;0.001</b>      | 0,996 (0,977-1,015),P=0.68                |
